# Supplementary material for: Investigating the Adsorption Kinetics of Dimethoate, Malathion and Chlorpyrifos on Cellulose-Derived Activated Carbons: Understanding the Influence of Physicochemical Properties
Source: MDPI journal article supplement (doi:10.3390/c9040103), 2023-11-03
Supplement: s1 [file s1]

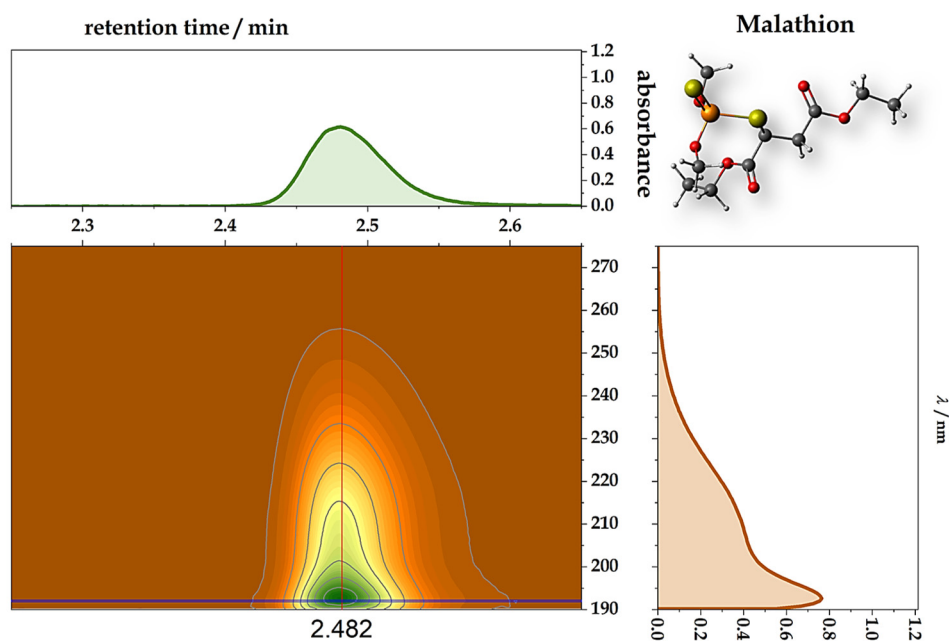

**Figure S1.** PDA signal of malathion ( $5 \times 10^{-4} \text{ mol dm}^{-3}$ ) with chromatogram and the UV-Vis spectrum at the selected retention time.

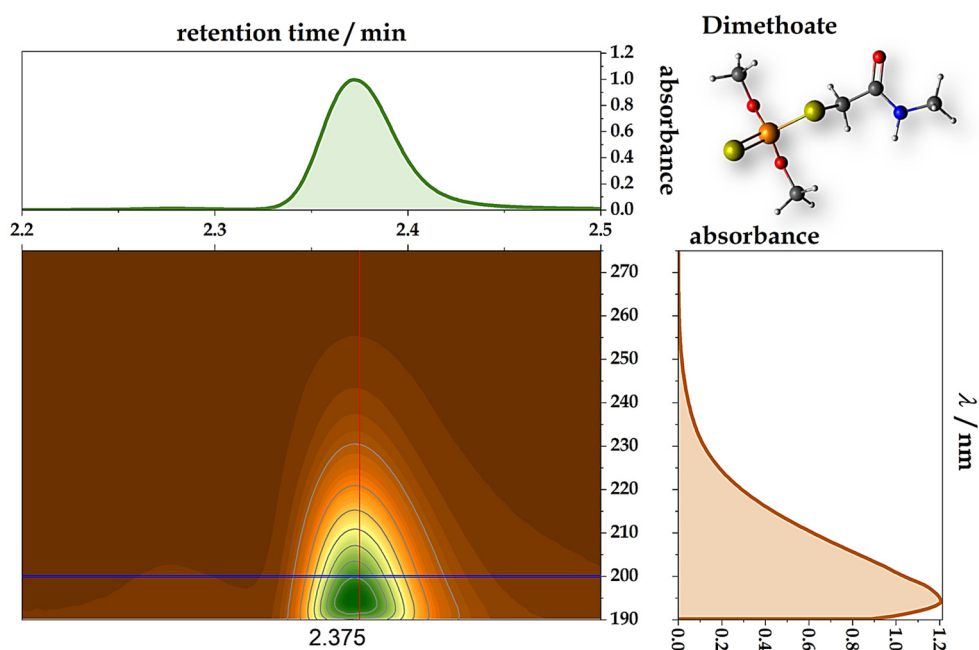

**Figure S2.** PDA signal of dimethoate ( $5 \times 10^{-4} \text{ mol dm}^{-3}$ ) with chromatogram and the UV-Vis spectrum at the selected retention time.

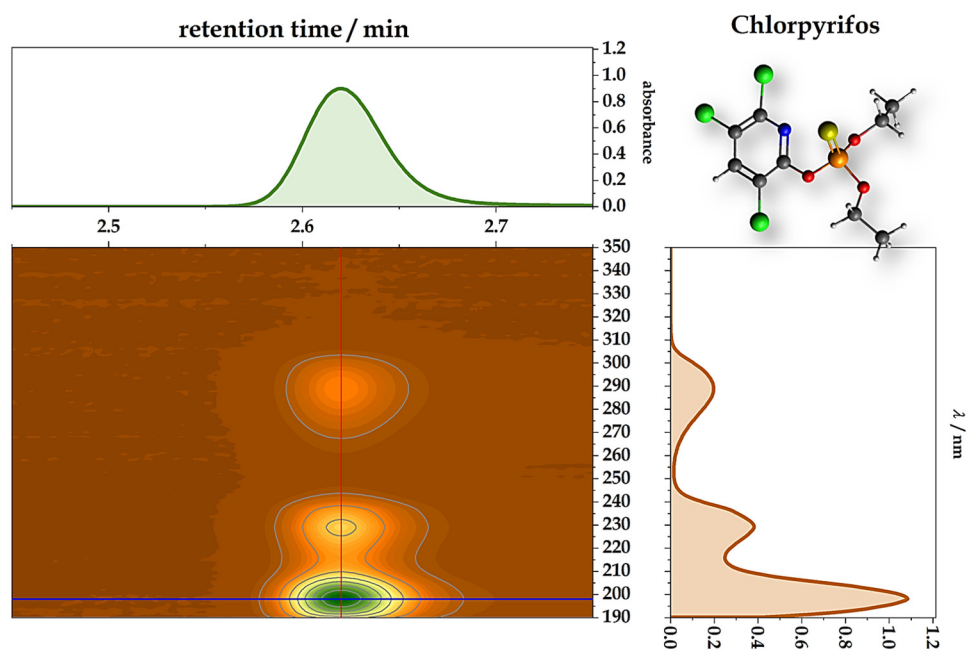

**Figure S3.** PDA signal of chlorpyrifos ( $5 \times 10^{-4} \text{ mol dm}^{-3}$ ) with chromatogram and the UV-Vis spectrum at the selected retention time.
